# Supplementary material
Source: PubMed Central journal article supplement (PMC7964704)
Supplement: 4375_supplement.pdf [file 4375_supplement.pdf]

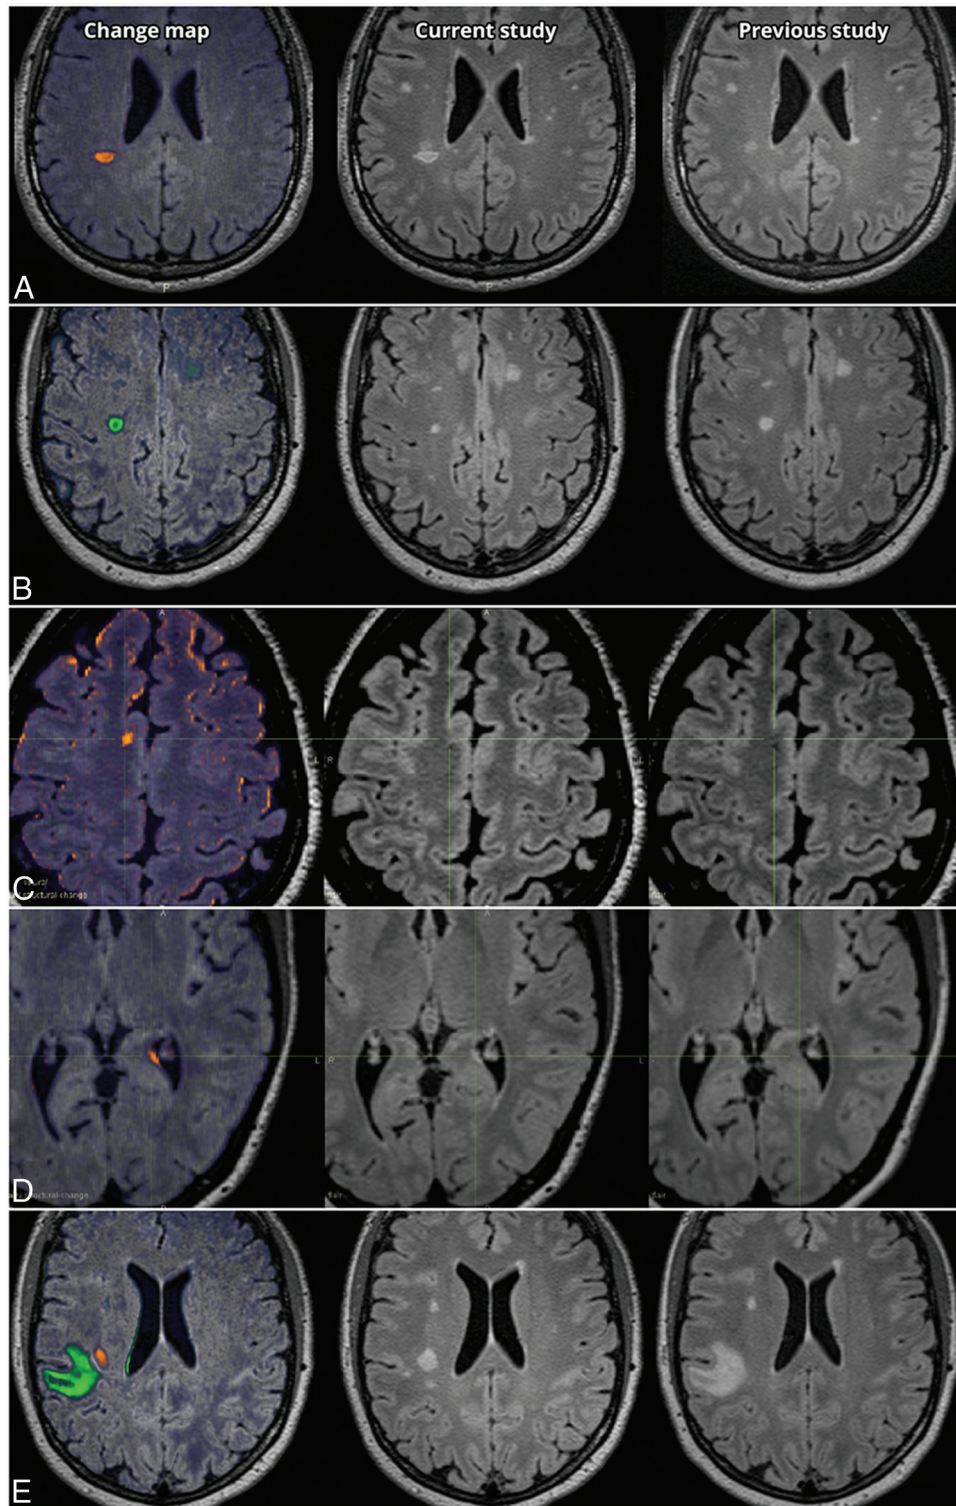

**ON-LINE FIG 1.** Examples of lesions that were missed on routine reporting but were found by using the software. Each row represents a different patient, with the change map demonstrating changed lesions in the left column (new lesions in orange and improved lesions in green), the current study in the middle column, and the previous comparison study on the right. *A*, New deep white matter plaque. *B*, Improved lesion deep white matter demonstrates a “doughnut” appearance of a concentrically shrinking lesion. *C*, Juxtacortical new plaque. *D*, Periventricular new plaque. *E*, Combined large improving lesion (green) with an adjacent new lesion (orange).

## Approximate background disease burden seen in the assessed study pairs

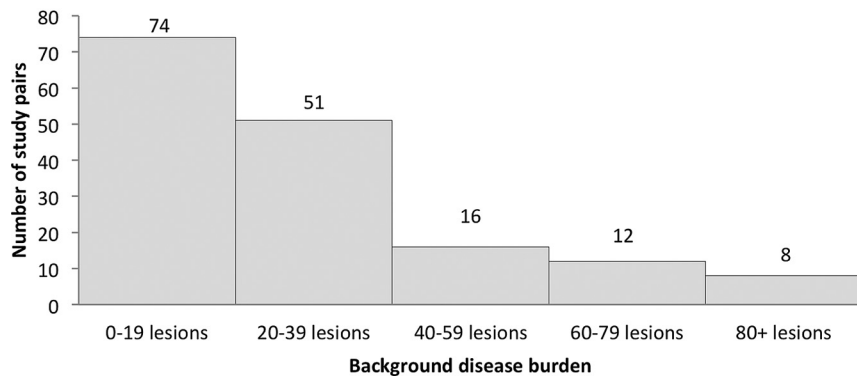

**ON-LINE FIG 2.** Distribution of background lesion burden observed in the assessed study pairs.

**On-line Table 1: Categorization of study pairs using both conventional side-by-side comparison and the software**

|                          | CSSC | VTS |
|--------------------------|------|-----|
| Stable <sup>a</sup>      | 31   | 29  |
| Progressive <sup>b</sup> | 11   | 14  |
| Discordant <sup>c</sup>  | 1    | 0   |
| Total                    | 43   | 43  |

<sup>a</sup> All study pairs categorized as stable using VTS were also categorized as stable using CSSC. Both reads found no new lesions.

<sup>b</sup> Both reads found at least 1 new lesion.

<sup>c</sup> One read found at least 1 new lesion, while the other read found no new lesions.

**On-line Table 2: Breakdown of retrospective management change by referring neurologists**

| Retrospective Management Plan Change                                     | Breakdown of Retrospective Management Changes |
|--------------------------------------------------------------------------|-----------------------------------------------|
| Change in imaging follow-up interval                                     | 19% (7/37)                                    |
| Change in medication regimen                                             | 35% (13/37)                                   |
| Change in medication regimen and imaging follow-up interval              | 8% (3/37)                                     |
| Change in clinical and imaging follow-up interval                        | 8% (3/37)                                     |
| Change in clinical and imaging follow-up interval and medication regimen | 30% (11/37)                                   |
